# Supplementary material
Source: Springer Nature journal article supplement (http://www.springermedizin.de/resource/supplementary/13054_2006_4573_MOESM4_ESM.pdf/9723254)

Figure 5: TPP (Mbar) for each animal (animal #1-6) in relation to continuous distending pressure (CDP) (mbar) and fractional changes (%) PaCO<sub>2</sub> compared to CDP 45 mbar. X = shunt fraction > 10 %; + =  $\Delta PaO_2/FiO_2$  ratio > 25%

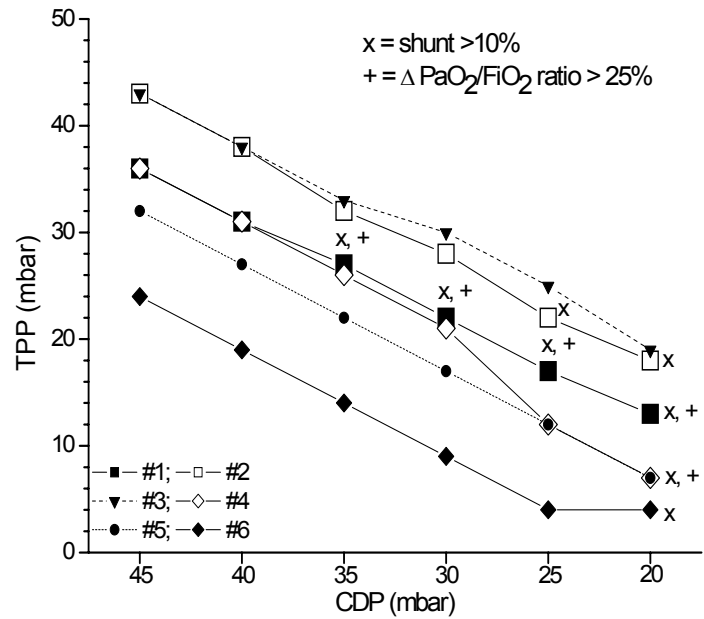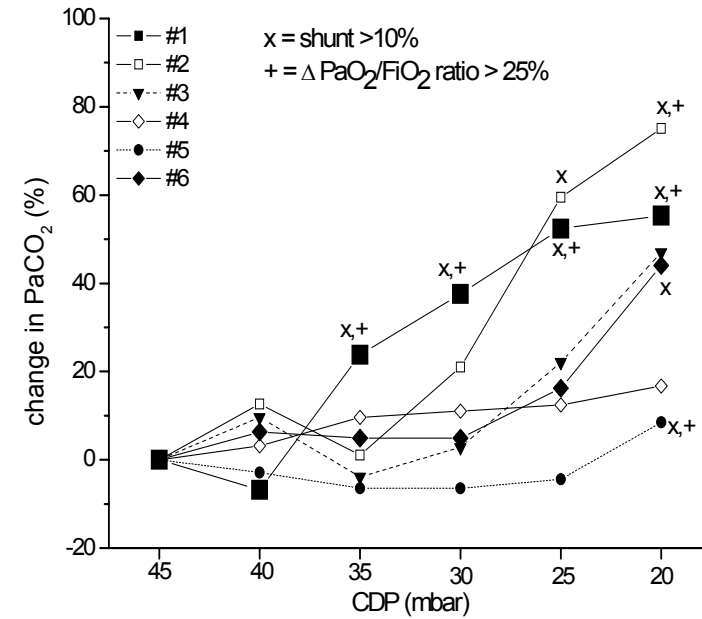

Supplement: MOESM4 [file 9723254]
